# Supplementary material
Source: publisher figshare collection journal article supplement (https://karger.figshare.com/ndownloader/files/30842902)
Supplement: Supplementary file 1 [file 30842902]

**Table 1S (online suppl.):** Results for %Time of Signal Quality classifiers during Recording

| **Measure-**  **ment** | **Classifier /Time frame** | ≤ 6 hours | **>6**  **≤ 12**  **hours** | **>12**  **≤ 18**  **hours** | **>18**  **≤ 24**  **hours** | **>24**  **≤ 30**  **hours** | **>30**  **≤ 36**  **hours** | **>36**  **≤ 42**  **hours** | **>42**  **≤ 48**  **hours** |
| --- | --- | --- | --- | --- | --- | --- | --- | --- | --- |
| **PI** | **high SigQ** | 96.9  (93.7,  98.2) | 95.0  (93.0,  96.1) | 93.8  (88.7,  97.0) | 94.2  (91.6,  97.1) | 93.0  (87.4,95.1) | 93.9  (89.4,95.3) | 93.6  (86.7,96.1) | 93.3  (88.3,  95.8) |
| **low SigQ** | 1.8  (1.2,  2.9) | 4.7  (3.0,  6.4) | 6.0 (2.7,  11.2) | 5.1  (2.9,  7.1) | 6.4  (4.3,  11.7) | 5.3  (4.1,  9.9) | 5.9  (3.8,  9.9) | 6.6  (4.0,  9.6) |
| **No Data** | 0.4  (0.0,  3.0) | 0.3  (0.1,  0.6) | 0.1  (0.1,  0.4) | 0.2  (0.1,  0.4) | 0.3  (0.1,  0.7) | 0.3  (0.1,  1.2) | 0.2  (0.1,  0.7) | 0.3  (0.1,  1.2) |
| **EC** | **high SigQ** | 73.2  (68.6,78.3) | 72.3  (60.6,  81.8) | 77.6  (69.0,  82.2) | 76.6  (73.6,  83.2) | 77.3  (68.2,82.0) | 75.6  (63.9,80.6) | 76.4  (53.3,79.8) | 73.9  (55.8,  80.5) |
| **Inter-**  **mediate SigQ** | 1.7 (1.2,  3.5) | 2.3  (1.2,  5.5) | 2.0  (1.5,  3.1) | 2.1  (1.2,  2.9) | 2.1  (1.3,  3.1) | 2.6  (1.3,  4.2) | 2.5  (1.5,  5.8) | 2.5  (1.8,  5.7) |
| **low SigQ** | 1.0  (0.7,  1.5) | 1.4  (0.6,  3.0) | 1.1  (0.7,  1.9) | 1.3  (0.7,  3.0) | 1.3  (0.6,  2.0) | 1.2  (0.7,  2.6) | 1.4  (0.8,  3.6) | 1.5  (0,9,  3.0) |
| **No Data** | 23.4  (19.3,26.8) | 24.0  (16.8,  30.9) | 20.0  (14.6,  25.9) | 19.1  (13.6,  23.7) | 19.4  (15.2,26.7) | 20.4  (16.2,28.9) | 20.6  (17.1,36.1) | 22.1  (17.0,  36.2) |

Data is presented as Median (Interquartile Range) for proportion of time (%time) with signal quality (SigQ) classifiers, PI Perfusion Index, EC Electrical Cardiometry (unaveraged data), categorized for PI as “high” (no exception code logged) or “low” (exception code logged) or No Data (no value logged for PI) and for EC as “high” (SigQ ≥70%), “intermediate” (SigQ ≥30%) or “low” (SigQ <30%) and “no data” (no logged value for CO)
